# Supplementary material for: Downstream Signaling Pathways in Mouse Adipose Tissues Following Acute In Vivo Administration of Fibroblast Growth Factor 21
Source: PubMed Central journal article supplement (PMC3765203; doi:10.1371/journal.pone.0073011), 2013-09-06

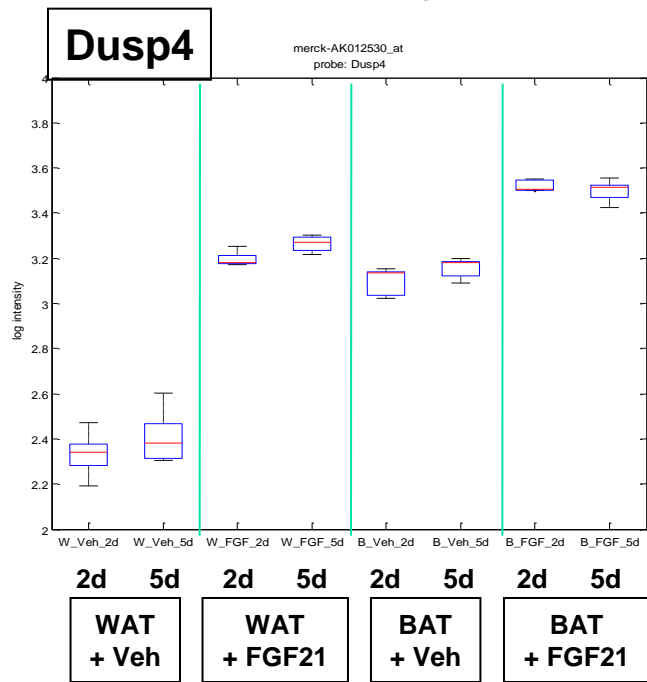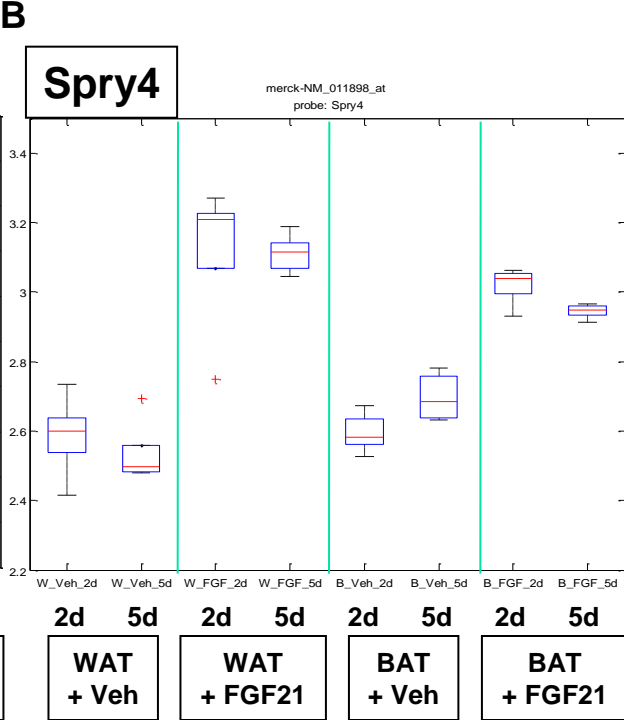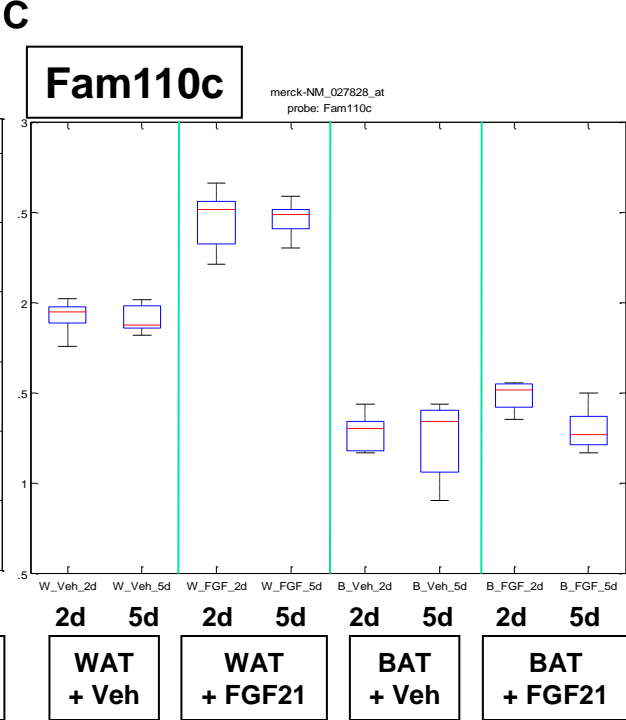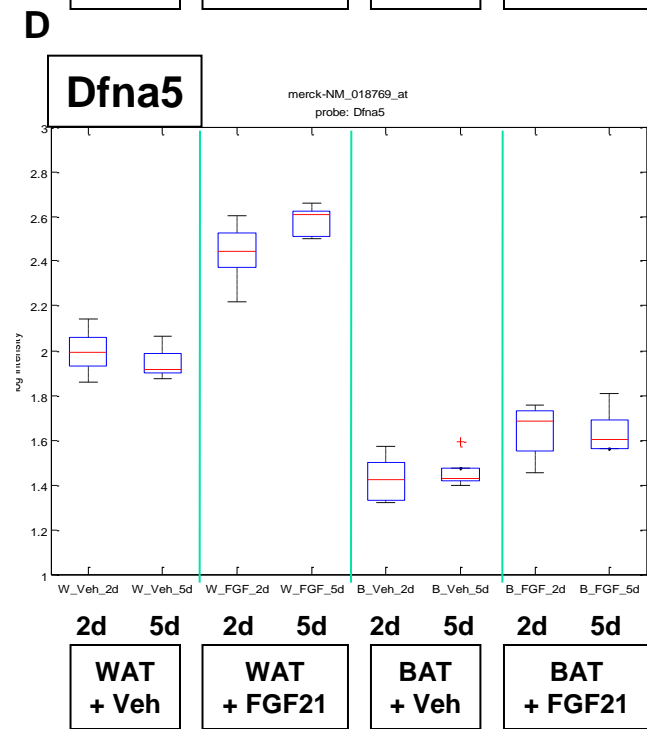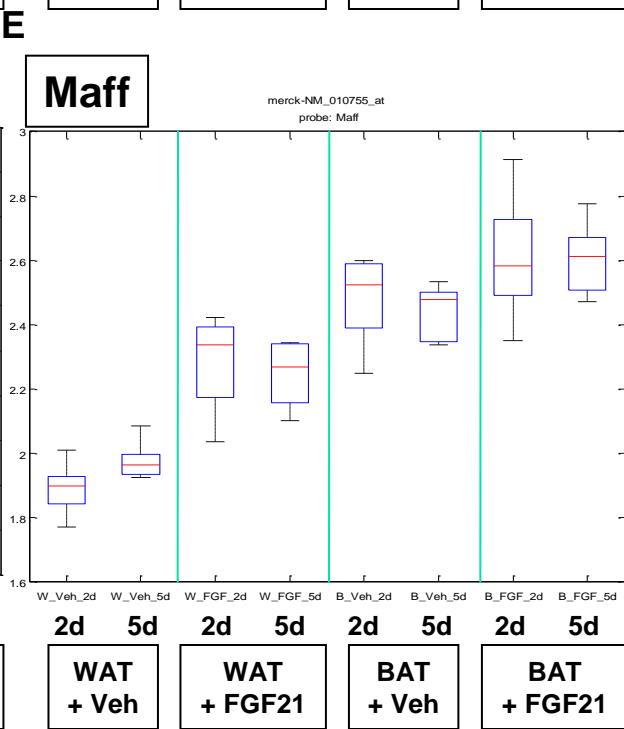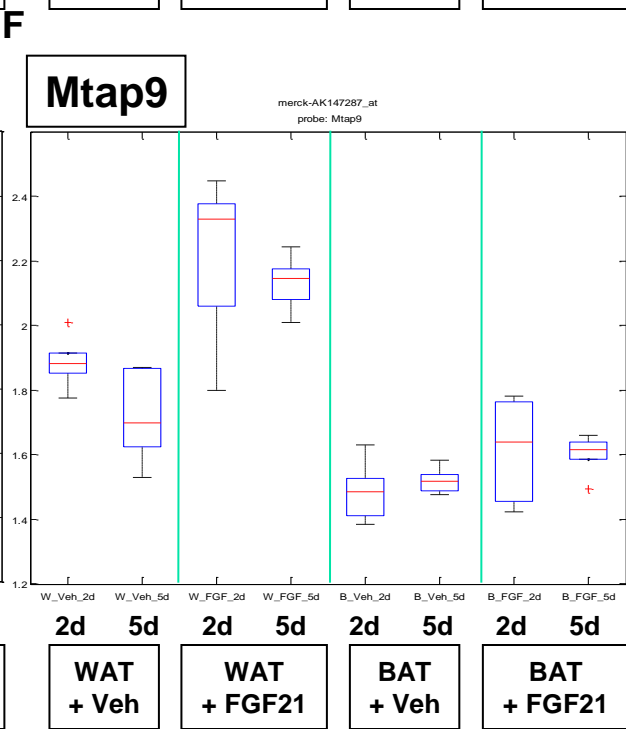

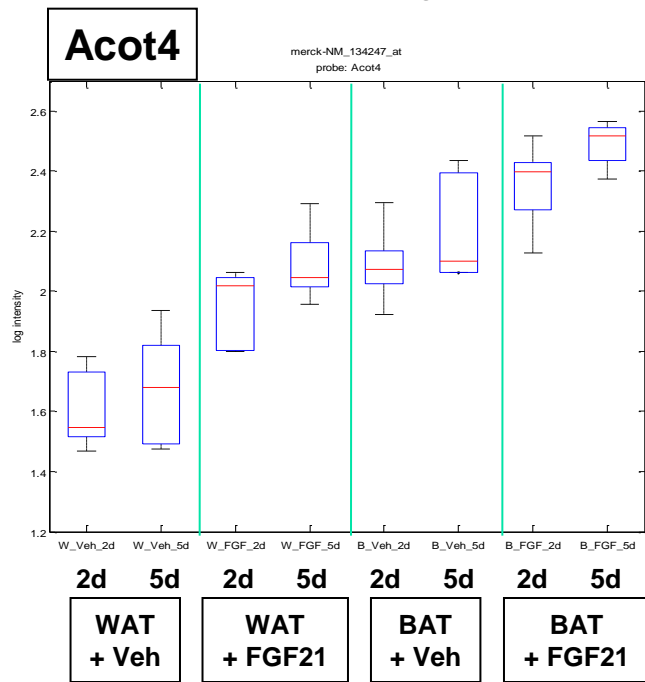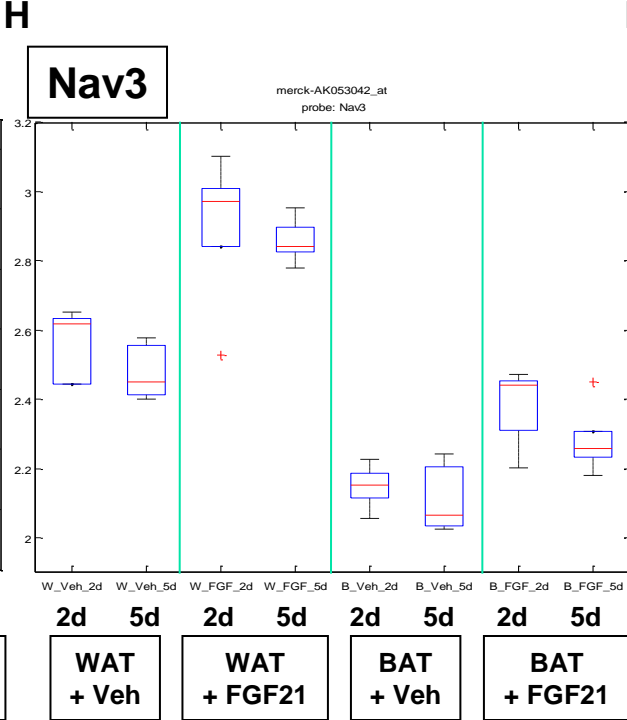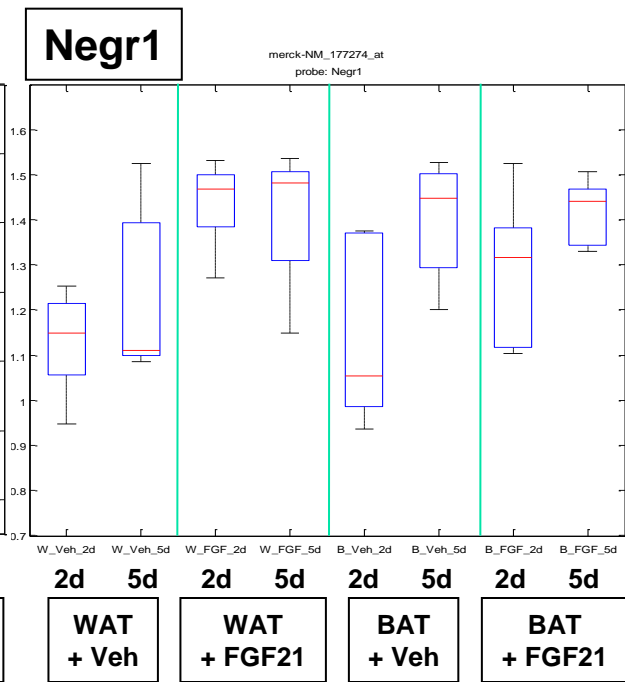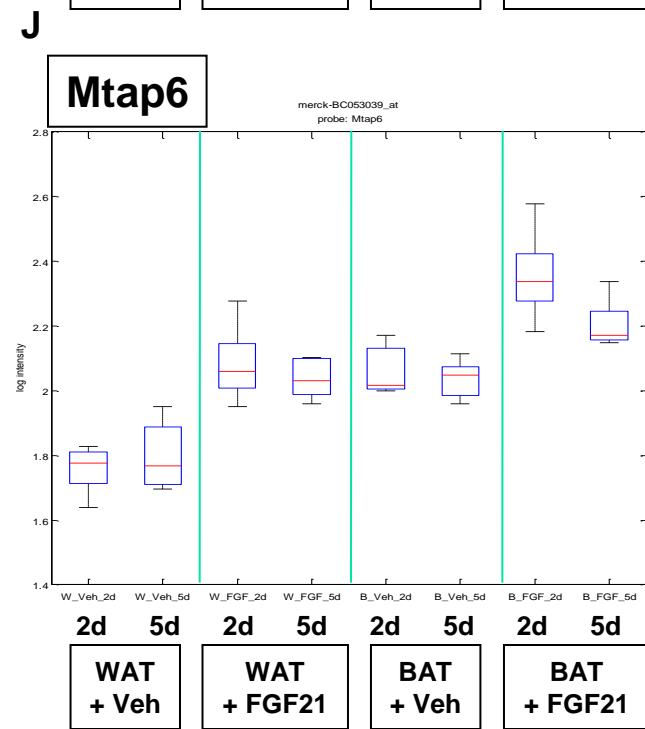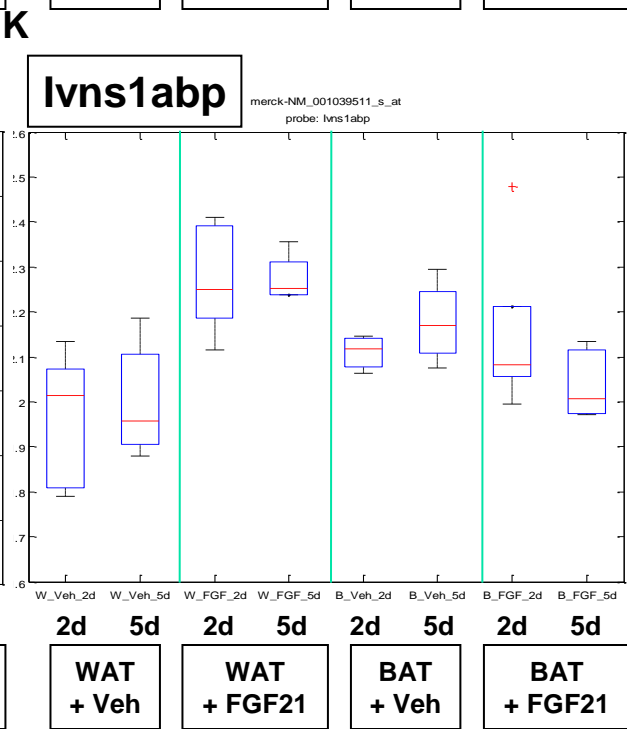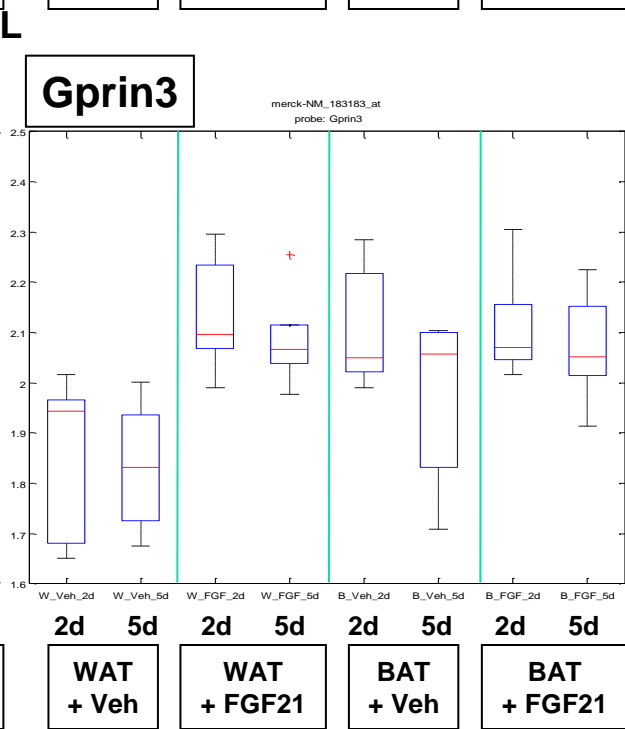

M Supplemental Figure S4

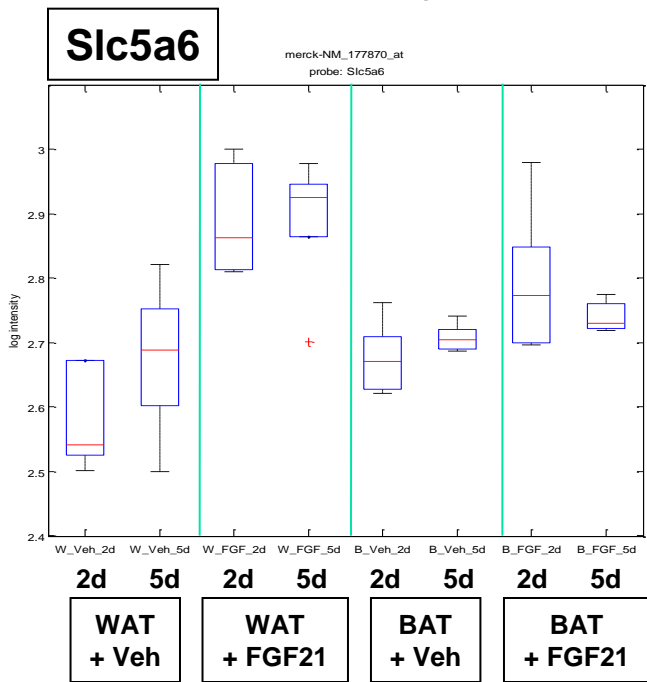

N

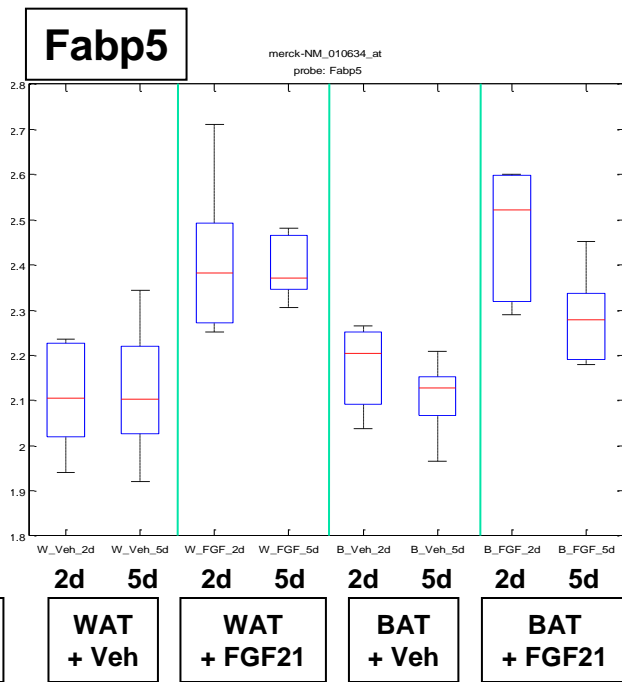

O

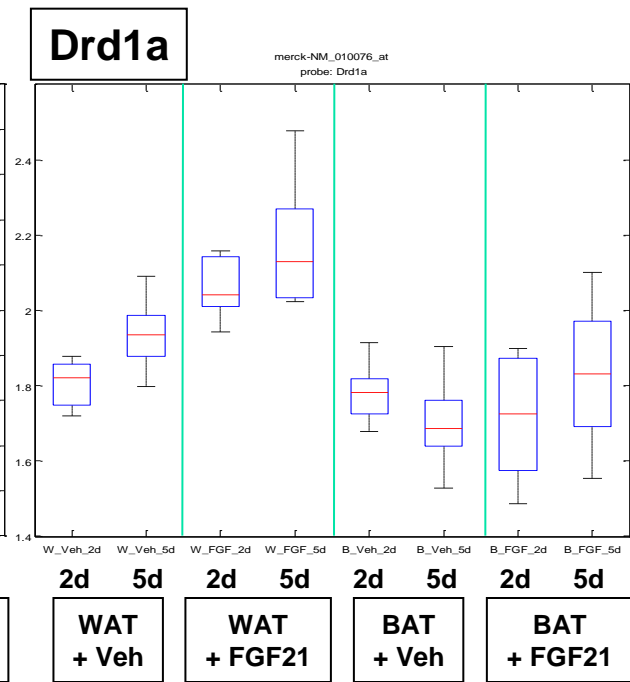

P

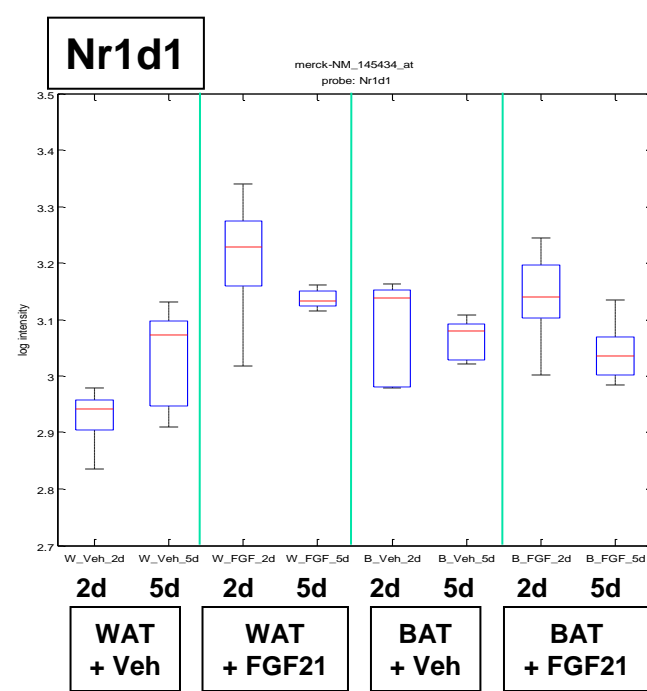

Q

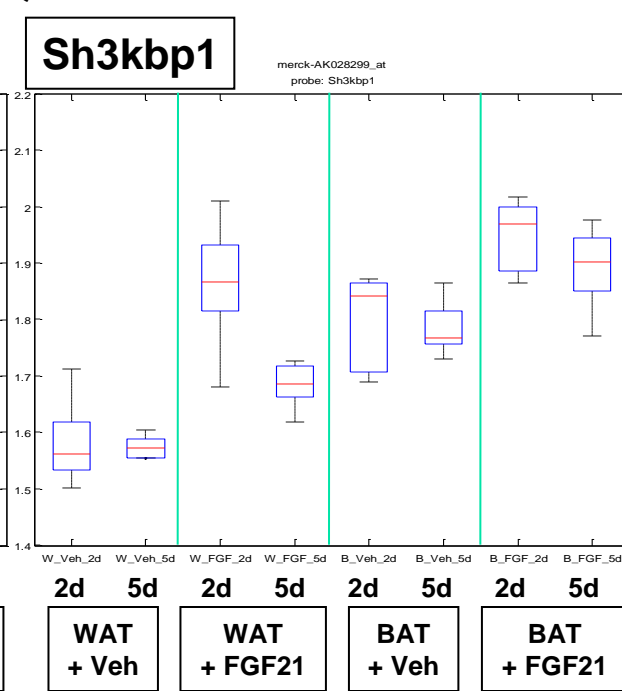

R

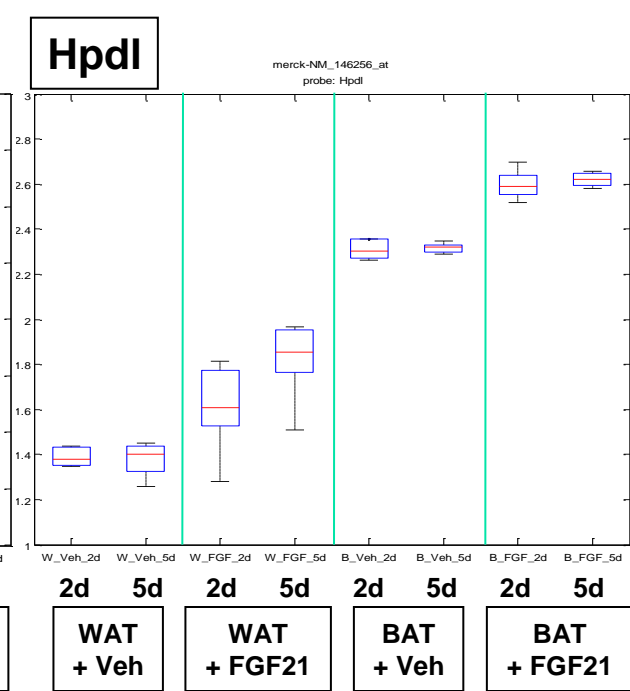

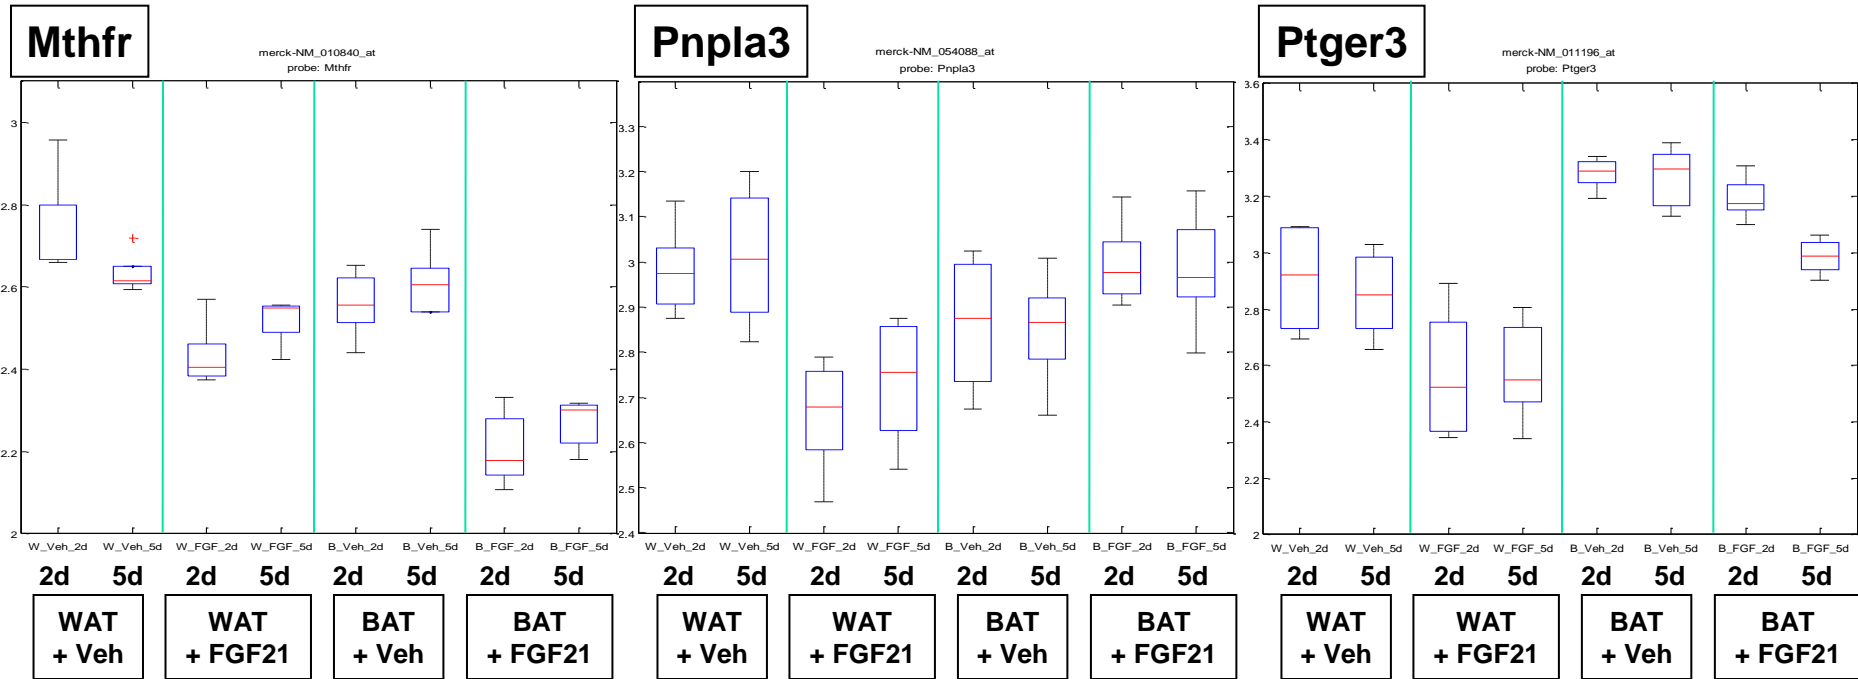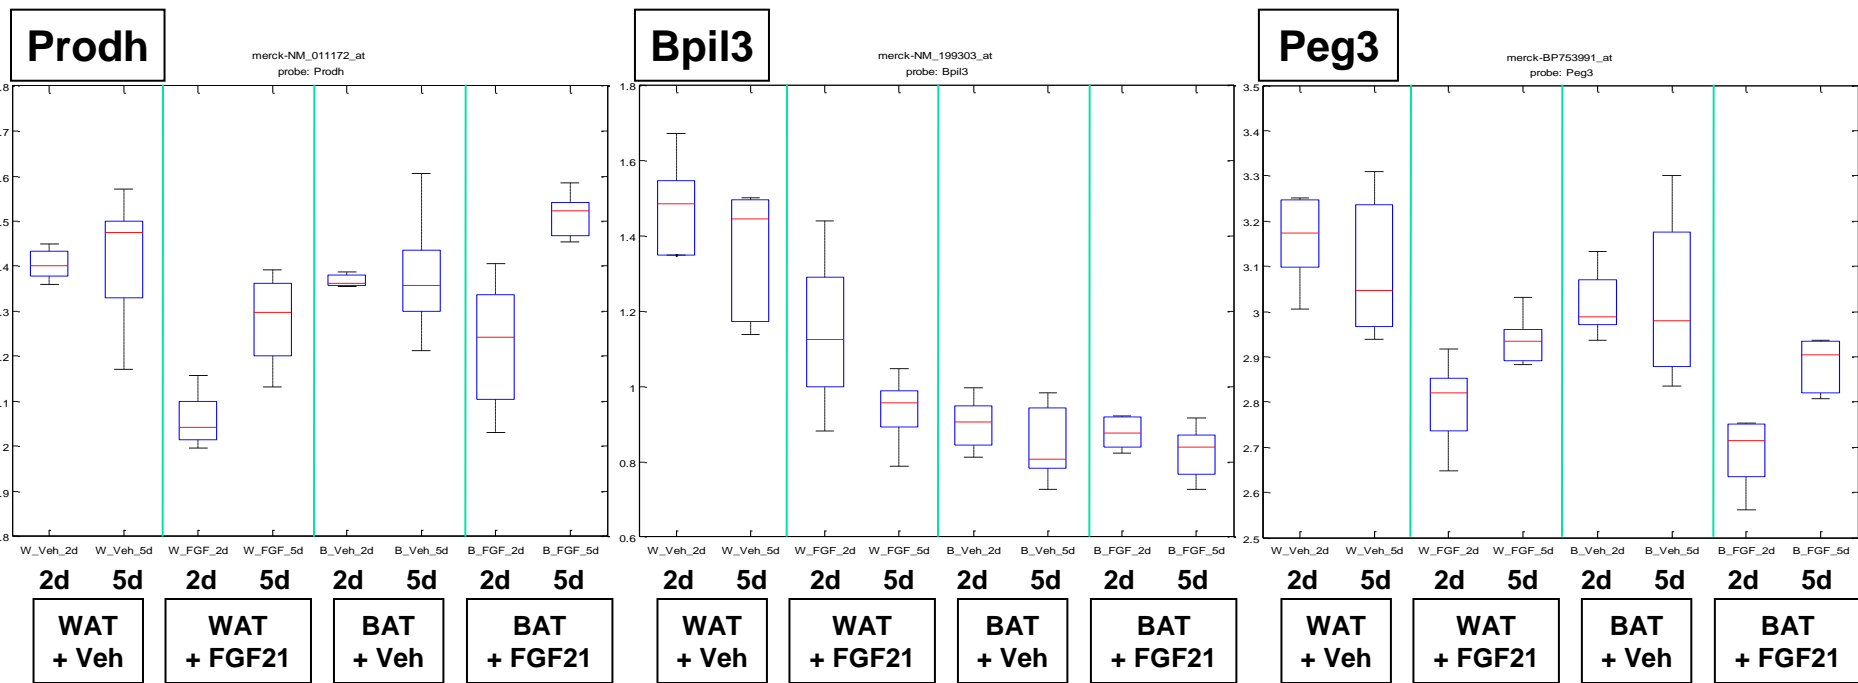

X

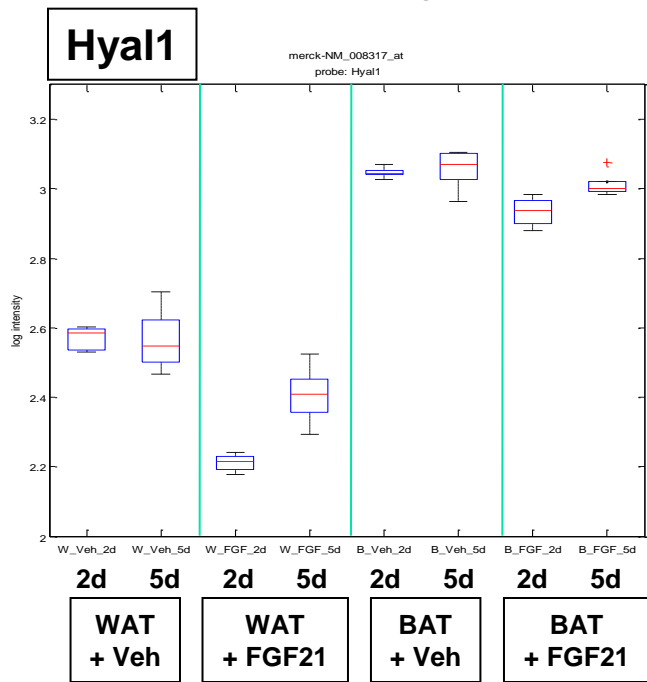

Y

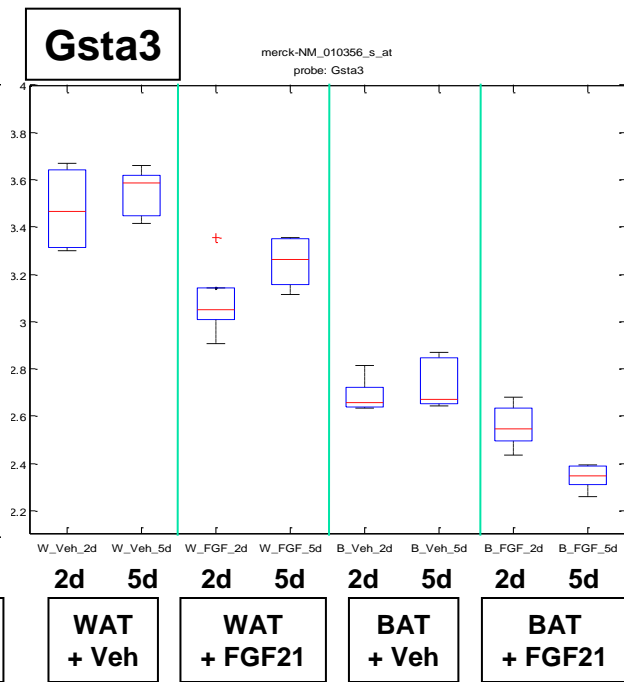

Z

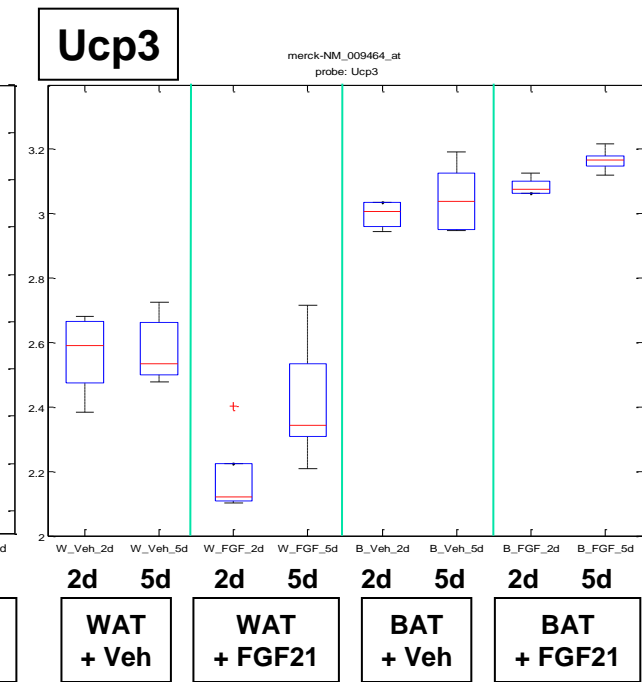

AA

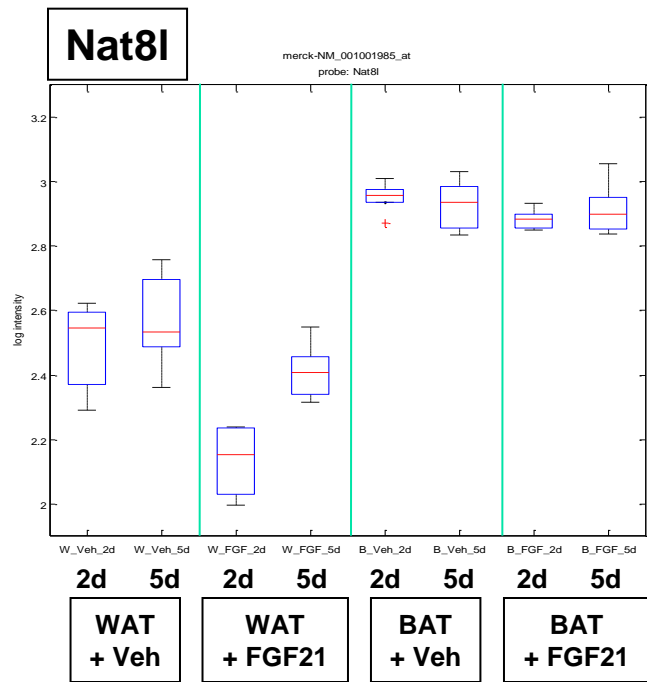

AB

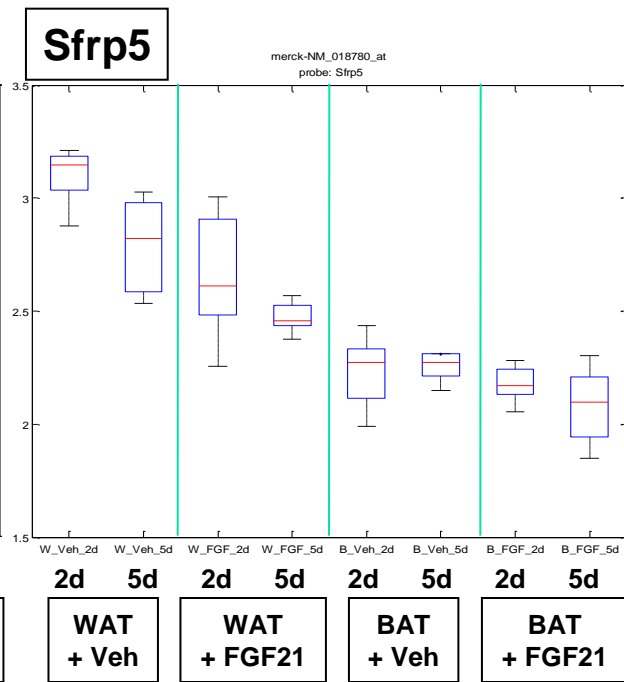

AC

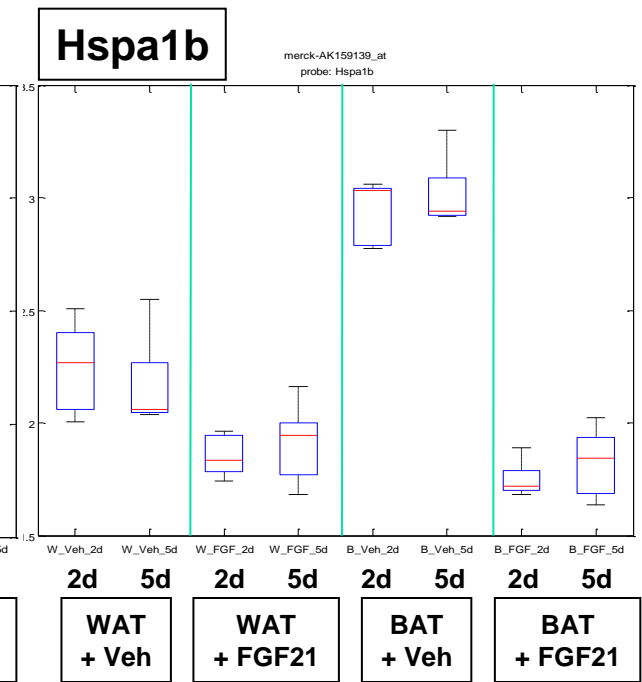

**AD** Supplemental Figure S4**AE****AF**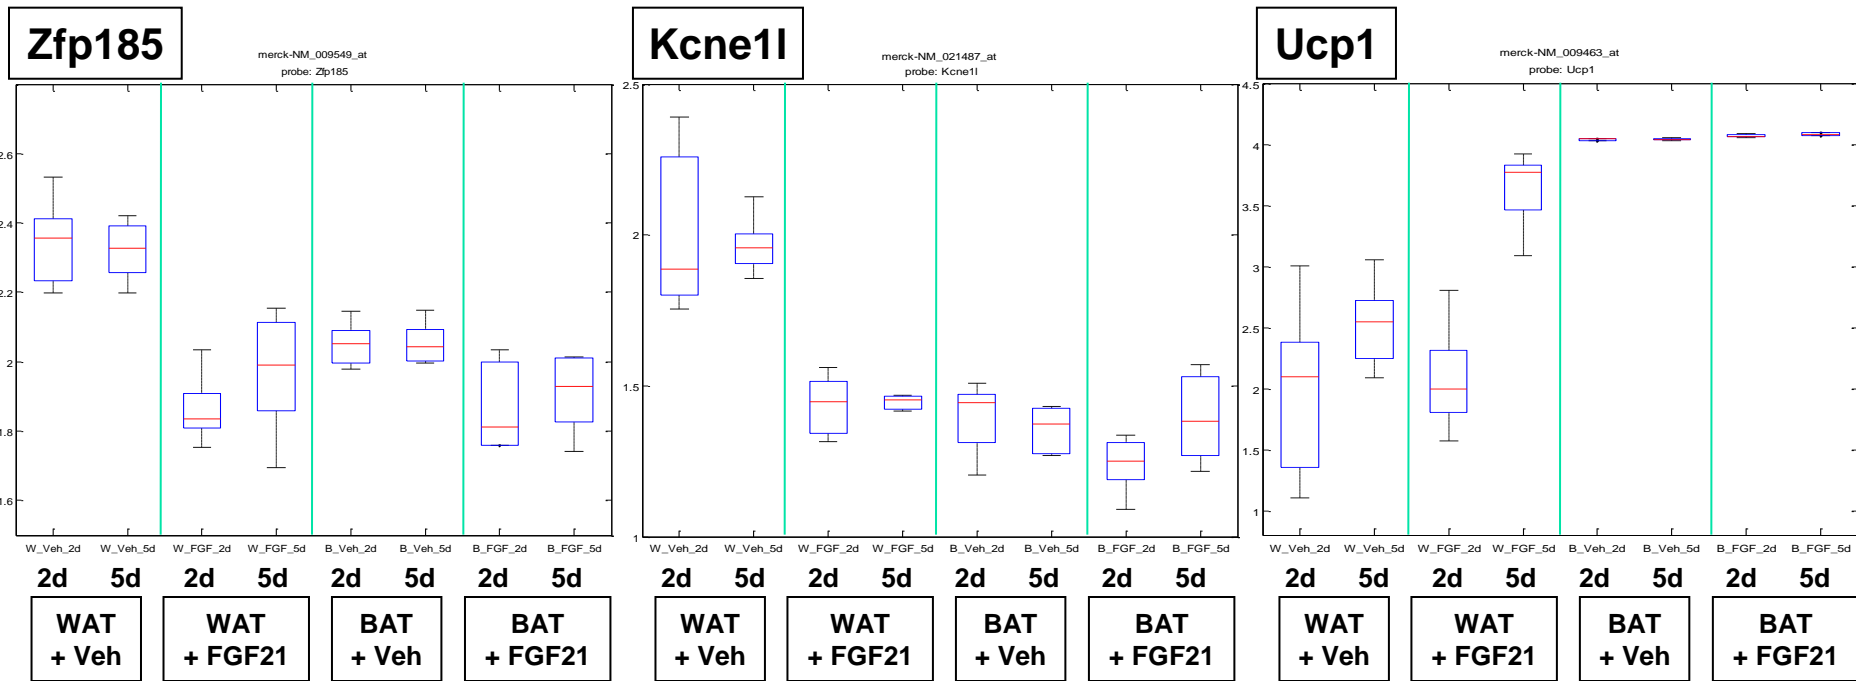

Supplement: pone.0073011.s004.pdf [file pone.0073011.s004.pdf]
