# Supplementary material for: Downstream Signaling Pathways in Mouse Adipose Tissues Following Acute In Vivo Administration of Fibroblast Growth Factor 21
Source: PubMed Central journal article supplement (PMC3765203; doi:10.1371/journal.pone.0073011), 2013-09-06

Supplemental Figure S2

**A**

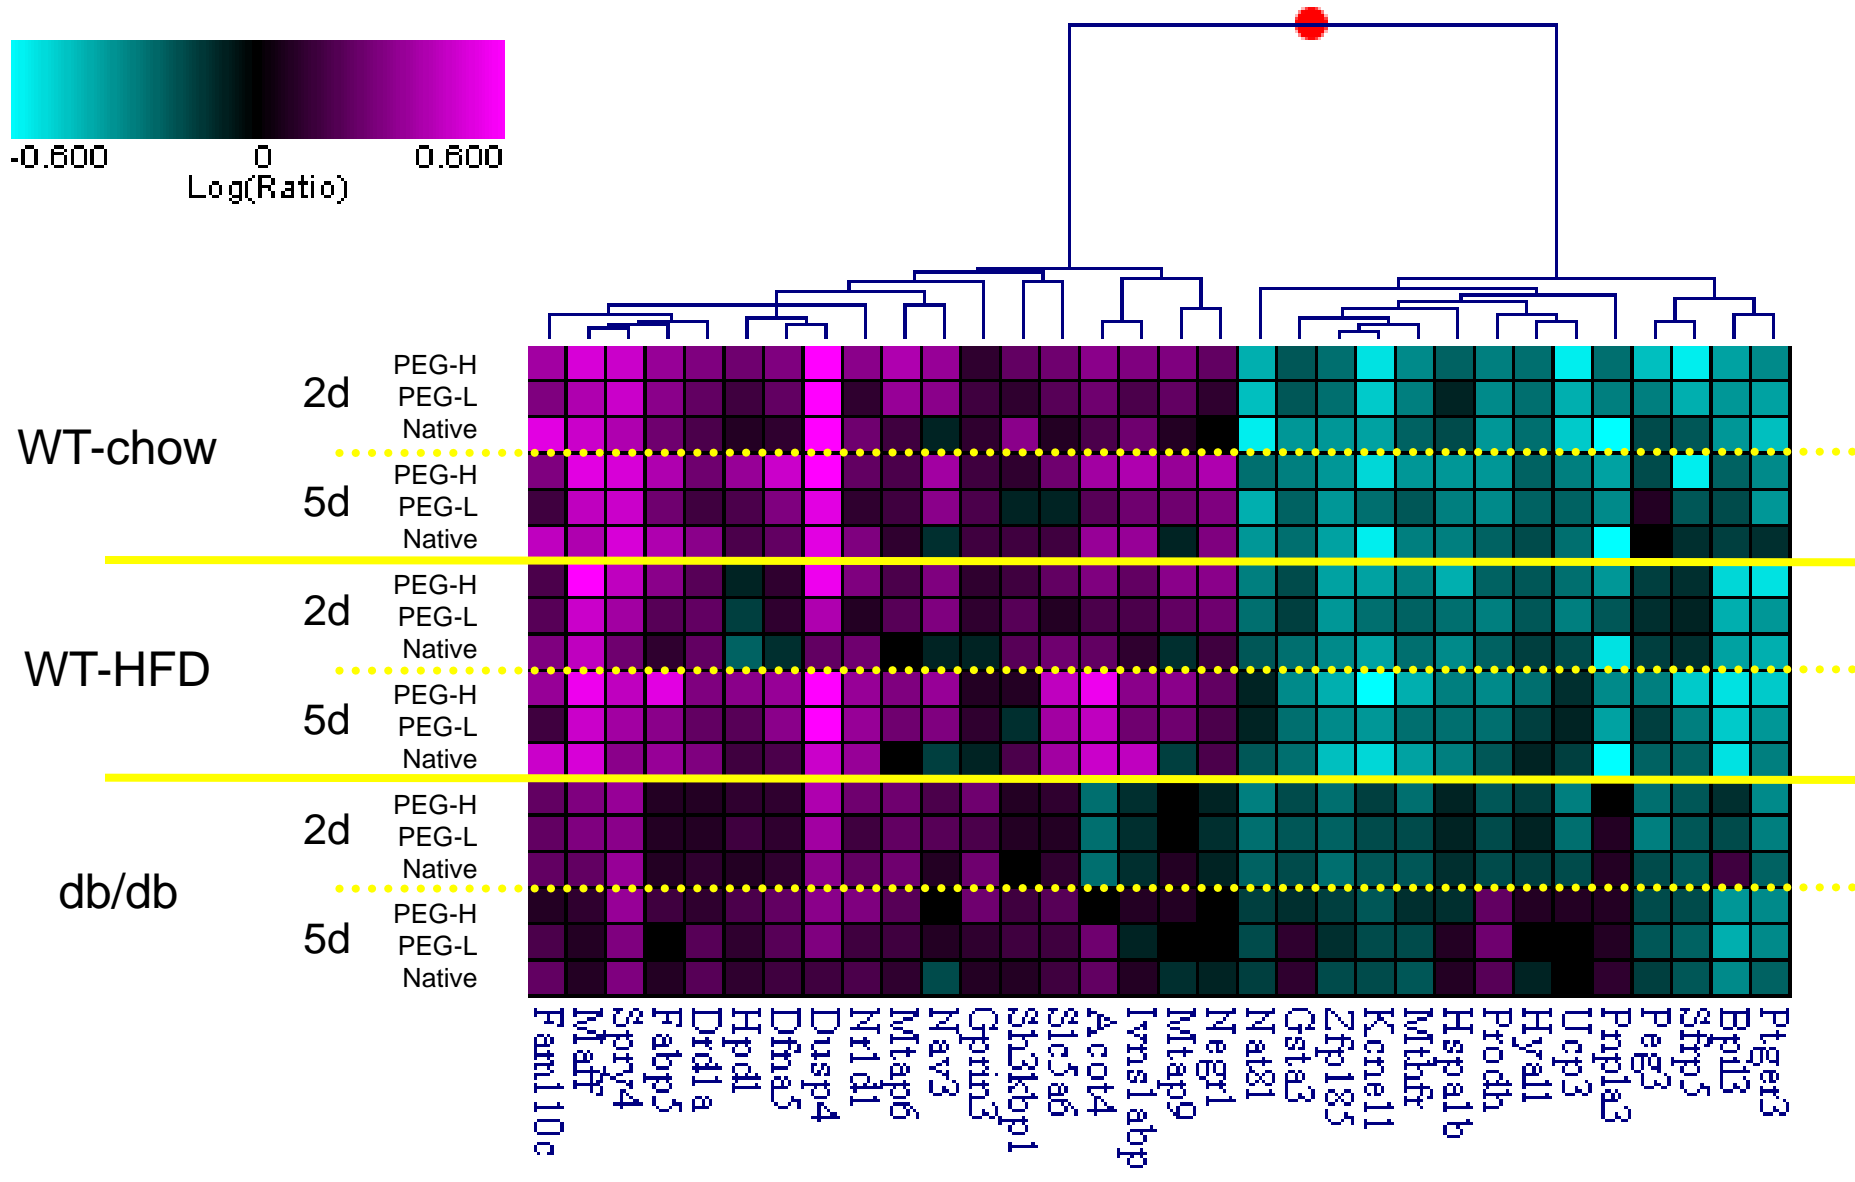

Supplemental Figure S2

**B**

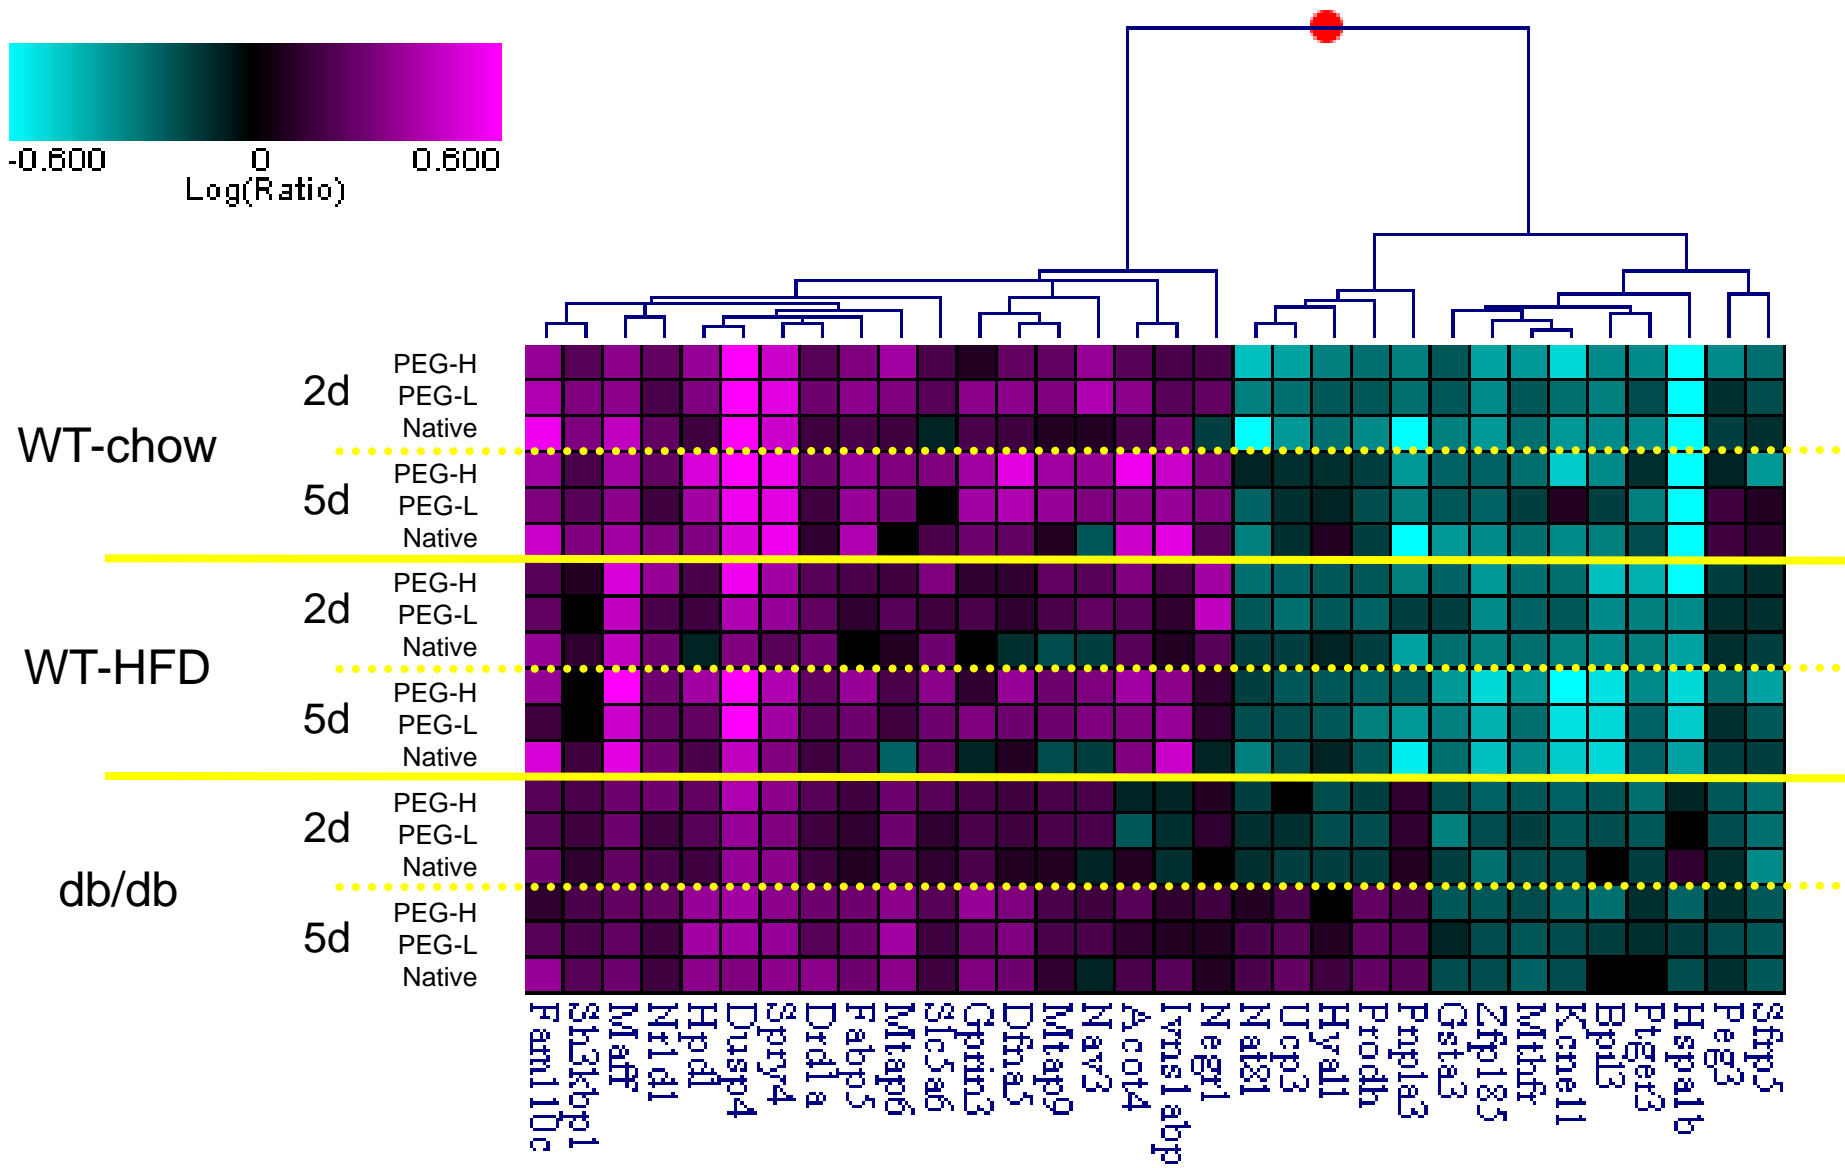

Supplement: pone.0073011.s002.pdf [file pone.0073011.s002.pdf]
