# Supplementary material for: Downstream Signaling Pathways in Mouse Adipose Tissues Following Acute In Vivo Administration of Fibroblast Growth Factor 21
Source: PubMed Central journal article supplement (PMC3765203; doi:10.1371/journal.pone.0073011), 2013-09-06
Supplement: pone.0073011.s003.pdf [file pone.0073011.s003.pdf]

# Supplemental Figure S3

Sfrp5 mRNA

FGF21 Treatment

“Disease” Comparison

WT Chow

WT HFD

db/db Chow

WT HFD + Veh  
WT Chow + Veh

db/db Chow + Veh  
WT Chow + Veh

PEG30-FGF21 Q108 2.5 mg/kg / Vehicle

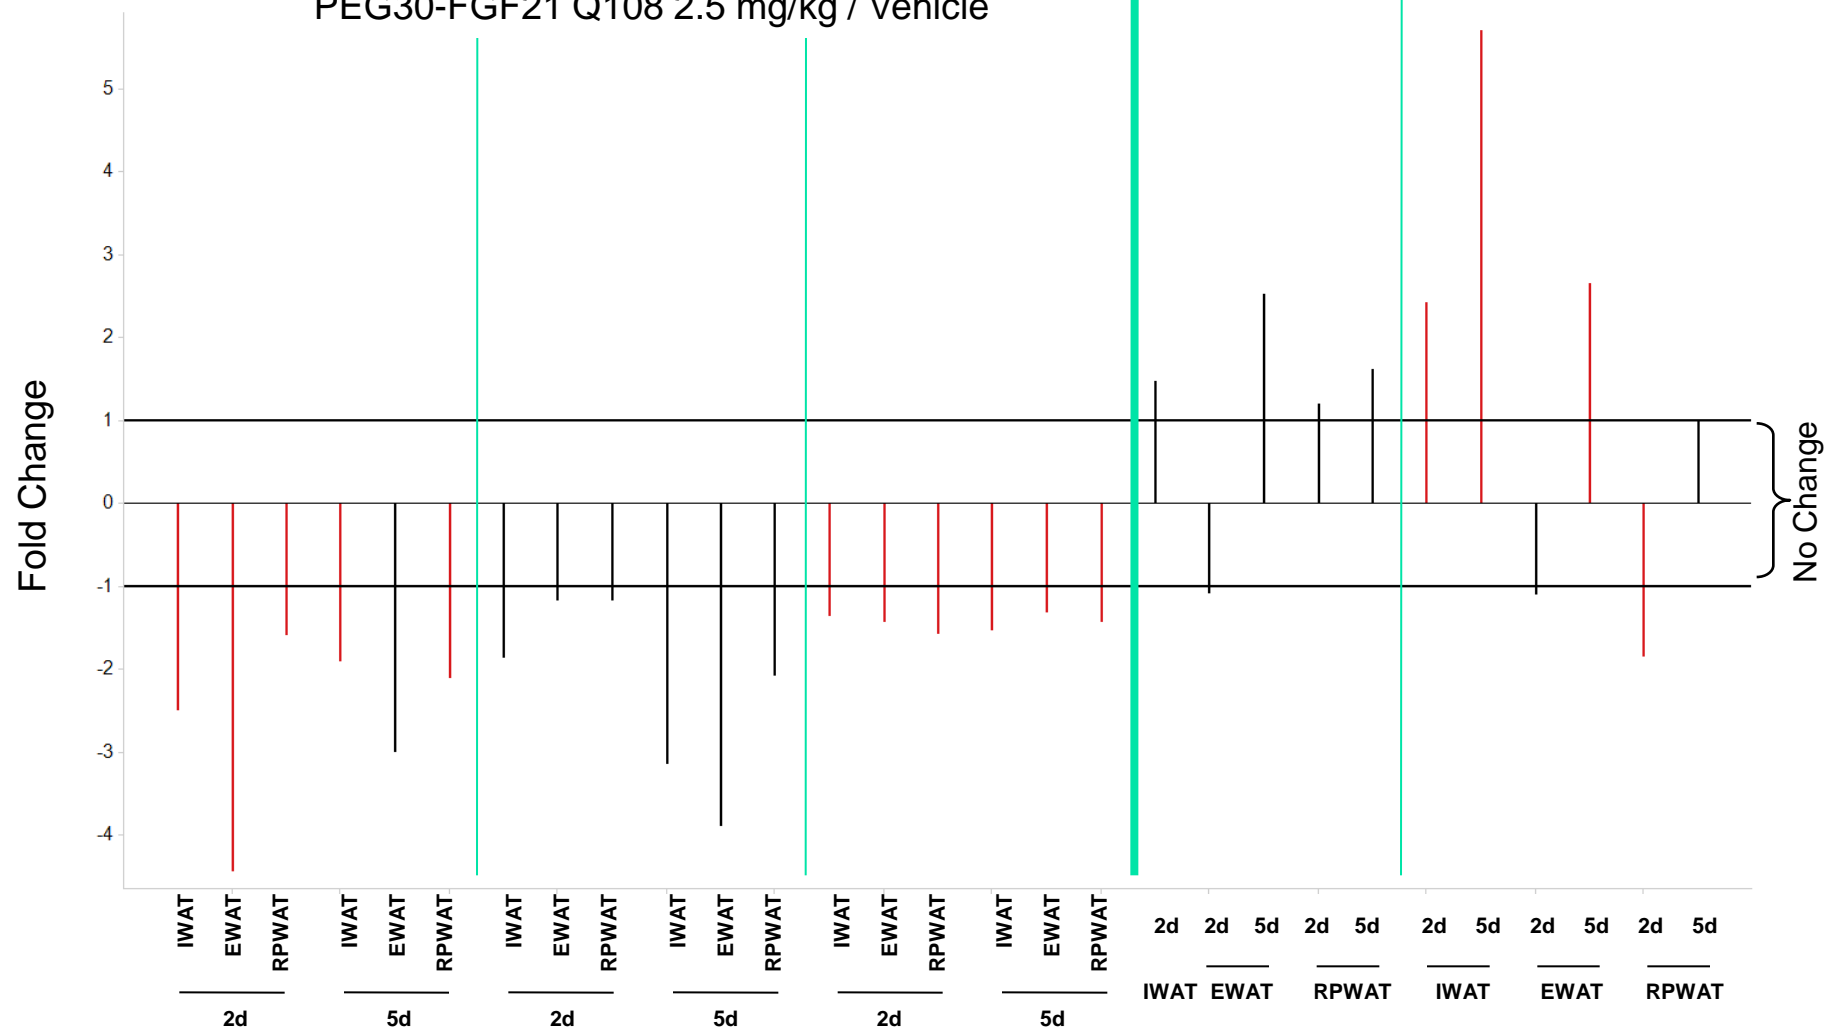

Red = p < 0.05  
Black = p > 0.05
