# Supplementary material for: Downstream Signaling Pathways in Mouse Adipose Tissues Following Acute In Vivo Administration of Fibroblast Growth Factor 21
Source: PubMed Central journal article supplement (PMC3765203; doi:10.1371/journal.pone.0073011), 2013-09-06

# Supplemental Figure S6

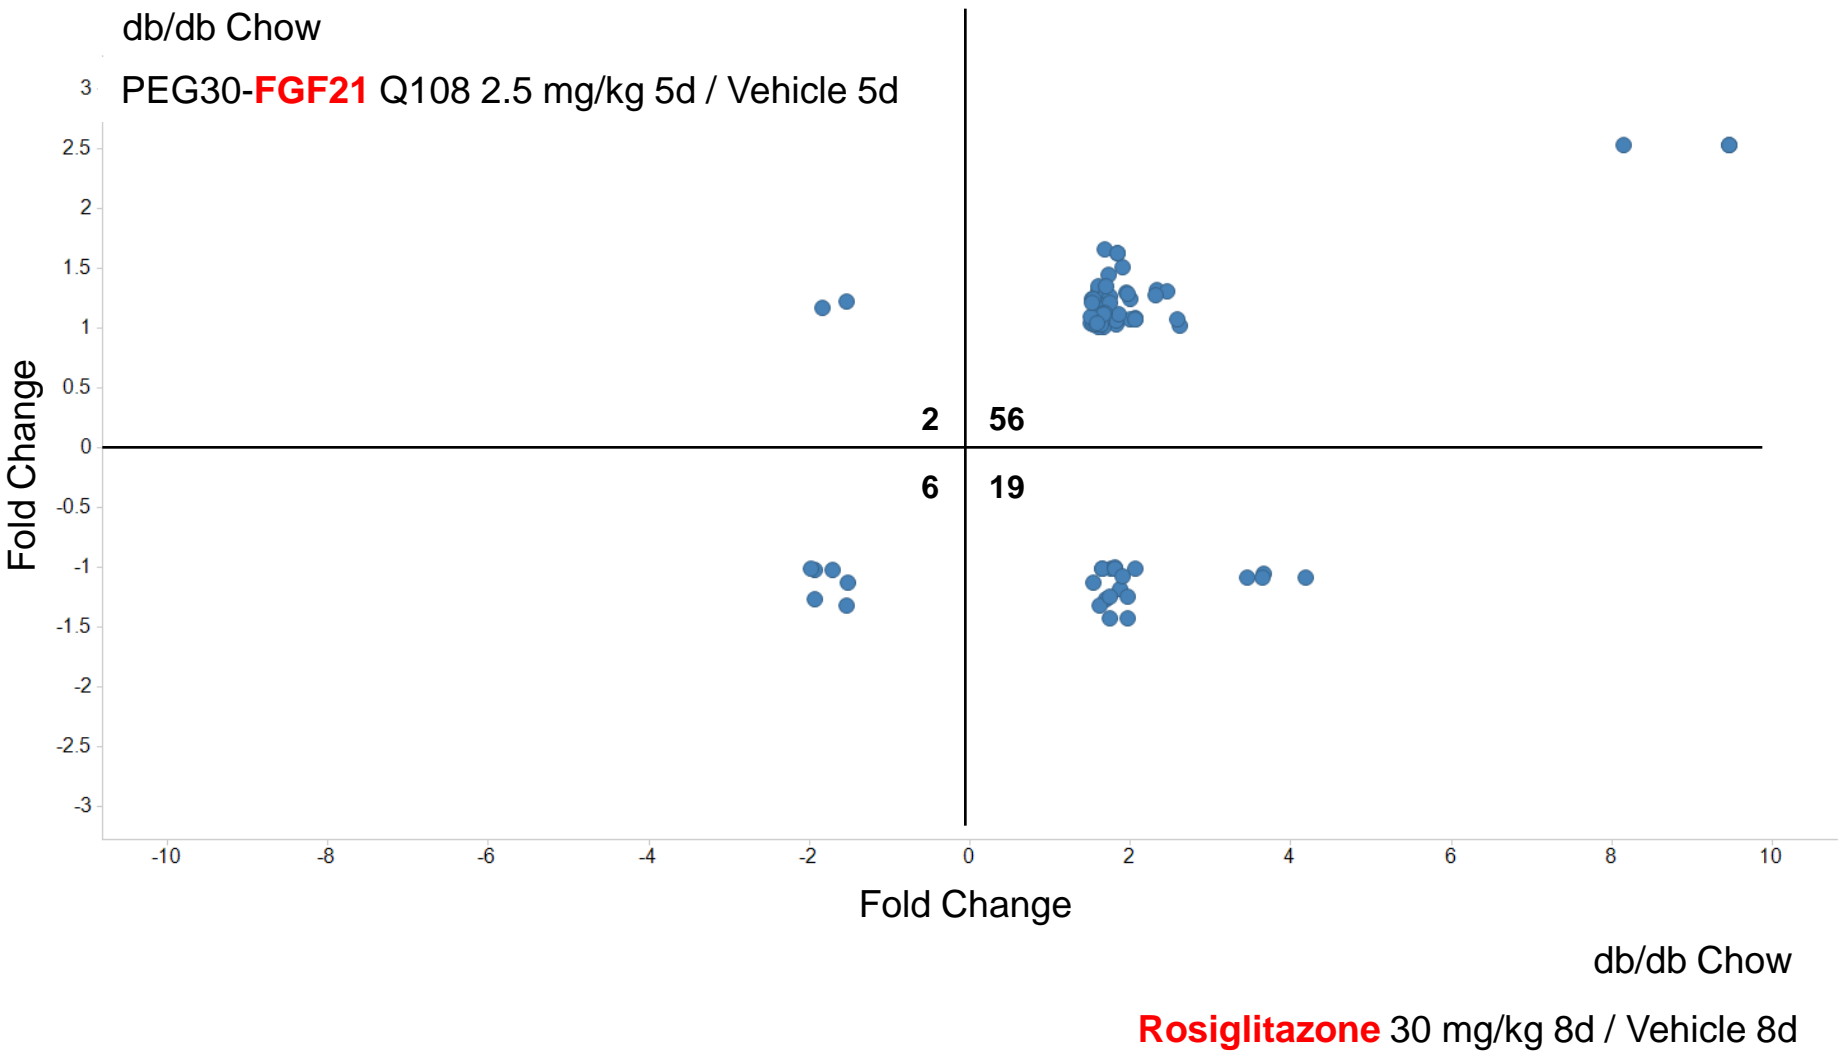

Supplement: pone.0073011.s006.pdf [file pone.0073011.s006.pdf]
